# Supplementary material
Source: MDPI journal article supplement (https://www.mdpi.com/2077-0472/13/2/256)
Supplement: s1 [file s1=3fversion=3d1674208964]

## Sheet: Table S1
Table S1. Information of cultivars used in this study
Genotype	Name	Earliness	Subspecies
G1	Sobaegbyeo	early maturing	japonica
G2	Odaebyeo	early maturing	japonica
G3	Unbongbyeo	early maturing	japonica
G4	Geumobyeo	early maturing	japonica
G5	Jinmibyeo	early maturing	japonica
G6	Obongbyeo	early maturing	japonica
G7	Namwonbyeo	early maturing	japonica
G8	Jinbuchalbyeo	early maturing	japonica
G11	Sinunbongbyeo	early maturing	japonica
G13	Dunnaebyeo	early maturing	japonica
G14	Joryeongbyeo	early maturing	japonica
G15	Unjangbyeo	early maturing	japonica
G16	Samcheonbyeo	early maturing	japonica
G17	Junghwabyeo	early maturing	japonica
G18	Keumobyeo 2ho	early maturing	japonica
G19	Gurubyeo	early maturing	japonica
G20	Heukjinjubyeo	early maturing	japonica
G21	Sangjuchalbyeo	early maturing	japonica
G22	Undoobyeo	early maturing	japonica
G23	Mananbyeo	early maturing	japonica
G24	Jeogjinju	early maturing	japonica
G25	Taebong	early maturing	japonica
G26	Jungsan	early maturing	japonica
G27	Saesangchu	early maturing	japonica
G28	Manchu	early maturing	japonica
G29	Manho	early maturing	japonica
G30	Namil	early maturing	japonica
G31	Joan	early maturing	japonica
G32	Heugkwang	early maturing	japonica
G33	Goun	early maturing	japonica
G34	Unkwang	early maturing	japonica
G35	Josaengheugchal	early maturing	japonica
G36	Odae1ho	early maturing	japonica
G37	Sinunbong 1ho	early maturing	japonica
G38	manna	early maturing	japonica
G39	Keumo3ho	early maturing	japonica
G40	Hwangkeumbora	early maturing	japonica
G41	Sandeuljinmi	early maturing	japonica
G43	Pyeongwon	early maturing	japonica
G44	Unmi	early maturing	japonica
G45	Handeul	early maturing	japonica
G46	Jogwang	early maturing	japonica
G47	BoSeog	early maturing	japonica
G48	Joami	early maturing	japonica
G49	Hanseol	early maturing	japonica
G50	Joun	early maturing	japonica
G51	Geumyoung	early maturing	japonica
G52	Manjong	early maturing	japonica
G53	Wolbaek	early maturing	japonica
G54	Seolbaek	early maturing	japonica
G55	Jopyeong	early maturing	japonica
G56	Jeogjinjuchal	early maturing	japonica
G57	Cheongbaekchal	early maturing	japonica
G58	Seolemi	early maturing	japonica
G59	Joeunheukmi	early maturing	japonica
G60	Saeodae	early maturing	japonica
G61	Jinseolchal	early maturing	japonica
G62	Jungmo1024ho	early maturing	japonica
G63	Sanhomi	early maturing	japonica
G64	Hwawang	early maturing	japonica
G65	Nunkeunheugchal	early maturing	japonica
G66	Asemi	early maturing	japonica
G67	Ondami	early maturing	japonica
G69	Jinok	early maturing	japonica
G71	Asemi1ho	early maturing	japonica
G72	Haedamssal	early maturing	japonica
G74	Unilchal	early maturing	japonica
G75	Jungmo1043	early maturing	japonica
G76	Jinhan	early maturing	japonica
G77	Jopum	early maturing	japonica
G78	Joil	early maturing	japonica
G79	Danpyeng	early maturing	japonica
G80	Unbaekchal	early maturing	japonica
G81	Jinkwang	early maturing	japonica
G82	Seongsan	early maturing	japonica
G83	Jonong	early maturing	japonica
G84	Shinpyeong	early maturing	japonica
G85	CW92-MR	early maturing	japonica
G86	Haedeul	early maturing	japonica
G87	IS592BB	early maturing	japonica
G88	Sinseonchalbyeo	medium maturing	japonica
G89	Gihobyeo	medium maturing	japonica
G90	Hwaseongbyeo	medium maturing	japonica
G91	Yeongdeogbyeo	medium maturing	japonica
G92	Palgongbyeo	medium maturing	japonica
G93	Hwajinbyeo	medium maturing	japonica
G95	Jannganbyeo	medium maturing	japonica
G96	Seoanbyeo	medium maturing	japonica
G97	Hwayeongbyeo	medium maturing	japonica
G98	Hwaseonchalbyeo	medium maturing	japonica
G99	Gancheokbyeo	medium maturing	japonica
G100	Hwajungbyeo	medium maturing	japonica
G102	Nonganbyeo	medium maturing	japonica
G103	Juanbyeo	medium maturing	japonica
G104	Keumobyeo 1ho	medium maturing	japonica
G105	Naepungbyeo	medium maturing	japonica
G106	Daejinbyeo	medium maturing	japonica
G107	Surabyeo	medium maturing	japonica
G109	Jinpum	medium maturing	japonica
G110	Sobi	medium maturing	japonica
G111	Seolhyangchal	medium maturing	japonica
G112	Sampyeong	medium maturing	japonica
G113	Hwaan	medium maturing	japonica
G114	Manpung	medium maturing	japonica
G115	Haepyeong	medium maturing	japonica
G116	Saegyehwa	medium maturing	japonica
G117	Manweol	medium maturing	japonica
G118	Youngan	medium maturing	japonica
G119	Geuman	medium maturing	japonica
G120	Daepyeong	medium maturing	japonica
G121	Samdeog	medium maturing	japonica
G122	Pungmi	medium maturing	japonica
G123	Boseogchal	medium maturing	japonica
G124	Haepyeongchal	medium maturing	japonica
G125	Seoan1ho	medium maturing	japonica
G126	Geunnun	medium maturing	japonica
G127	Cheonga	medium maturing	japonica
G128	Gangbaek	medium maturing	japonica
G129	Haechanmulgyeol	medium maturing	japonica
G130	Donghaejinmi	medium maturing	japonica
G131	Cheongdam	medium maturing	japonica
G132	HONGJINJU	medium maturing	japonica
G133	Nunbora	medium maturing	japonica
G134	Cheongan	medium maturing	japonica
G135	Borami	medium maturing	japonica
G137	Heugseol	medium maturing	japonica
G138	Haeoreumi	medium maturing	japonica
G139	Boseogheugchal	medium maturing	japonica
G140	Migwang	medium maturing	japonica
G141	Cheongnam	medium maturing	japonica
G142	Suryeojinmi	medium maturing	japonica
G143	Gangchan	medium maturing	japonica
G144	Suan	medium maturing	japonica
G145	Shinbaeg	medium maturing	japonica
G146	Dongbo	medium maturing	japonica
G147	Jungsaenggold	medium maturing	japonica
G148	Seonhyangheukmi	medium maturing	japonica
G149	Daebo	medium maturing	japonica
G150	Geonyang2ho	medium maturing	japonica
G151	Dabo	medium maturing	japonica
G152	Dodamssal	medium maturing	japonica
G153	Bodrami	medium maturing	japonica
G154	Sinbo	medium maturing	japonica
G155	Jungmo1034	medium maturing	japonica
G156	Haepum	medium maturing	japonica
G157	Seonpum	medium maturing	japonica
G158	Youngbo	medium maturing	japonica
G160	Cheongpum	medium maturing	japonica
G161	Sangbo	medium maturing	japonica
G162	Heugjinmi	medium maturing	japonica
G163	Boramchal	medium maturing	japonica
G165	Dongjinbyeo	medium-late maturing	japonica
G166	Daecheongbyeo	medium-late maturing	japonica
G167	Tamjinbyeo	medium-late maturing	japonica
G168	Kyehwabyeo	medium-late maturing	japonica
G169	Ilpumbyeo	medium-late maturing	japonica
G170	Manguembyeo	medium-late maturing	japonica
G171	Hwanambyeo	medium-late maturing	japonica
G172	Daeanbyeo	medium-late maturing	japonica
G174	Hwasinbyeo	medium-late maturing	japonica
G175	Hyangnambyeo	medium-late maturing	japonica
G176	Ilmibyeo	medium-late maturing	japonica
G177	Donganbyeo	medium-late maturing	japonica
G178	Hwasambyeo	medium-late maturing	japonica
G179	Daesanbyeo	medium-late maturing	japonica
G180	Nampyeongbyeo	medium-late maturing	japonica
G181	Heugnambyeo	medium-late maturing	japonica
G182	Aranghangchalbyeo	medium-late maturing	japonica
G183	Hoanbyeo	medium-late maturing	japonica
G184	Dongjinchal	medium-late maturing	japonica
G185	Mihyangbyeo	medium-late maturing	japonica
G186	Sindongjin	medium-late maturing	japonica
G187	Sujin	medium-late maturing	japonica
G188	Hojin	medium-late maturing	japonica
G189	Heughyang	medium-late maturing	japonica
G190	Junam	medium-late maturing	japonica
G191	Goami	medium-late maturing	japonica
G192	Dongin 1 ho	medium-late maturing	japonica
G193	Baekjinju	medium-late maturing	japonica
G194	Seolgaeng	medium-late maturing	japonica
G195	Goami2ho	medium-late maturing	japonica
G196	Manmi	medium-late maturing	japonica
G197	Samkwang	medium-late maturing	japonica
G198	Hopyung	medium-late maturing	japonica
G200	Hwarang	medium-late maturing	japonica
G201	Gopum	medium-late maturing	japonica
G202	Cheongho	medium-late maturing	japonica
G203	Hanmaeum	medium-late maturing	japonica
G204	Pungmi1ho	medium-late maturing	japonica
G205	Onnuri	medium-late maturing	japonica
G206	Hanam	medium-late maturing	japonica
G207	Dongjin2	medium-late maturing	japonica
G208	Baegjinju1ho	medium-late maturing	japonica
G209	Hwangkeumnuri	medium-late maturing	japonica
G210	Dami	medium-late maturing	japonica
G211	Malgeumi	medium-late maturing	japonica
G212	Hopum	medium-late maturing	japonica
G213	Saenuri	medium-late maturing	japonica
G214	Chilbo	medium-late maturing	japonica
G215	Hwanggeumnodeul	medium-late maturing	japonica
G216	Baegseolchal	medium-late maturing	japonica
G217	Cheongcheongjinmi	medium-late maturing	japonica
G218	Jinbaek	medium-late maturing	japonica
G219	Dacheong	medium-late maturing	japonica
G220	Jinsumi	medium-late maturing	japonica
G221	Jungmo1006ho	medium-late maturing	japonica
G222	Deuraechan	medium-late maturing	japonica
G223	Haiami	medium-late maturing	japonica
G224	Baekogchal	medium-late maturing	japonica
G226	Cheonghaejinmi	medium-late maturing	japonica
G227	Honong	medium-late maturing	japonica
G228	Seomyeong	medium-late maturing	japonica
G229	Younghojinmi	medium-late maturing	japonica
G230	Jinbo	medium-late maturing	japonica
G233	Anmi	medium-late maturing	japonica
G234	Mipum	medium-late maturing	japonica
G235	Chinnong	medium-late maturing	japonica
G236	Geongganghongmi	medium-late maturing	japonica
G237	Sodami	medium-late maturing	japonica
G238	Sukwang	medium-late maturing	japonica
G239	Huimangchan	medium-late maturing	japonica
G240	Geonyangmi	medium-late maturing	japonica
G241	Saeilmi	medium-late maturing	japonica
G242	Saegoami	medium-late maturing	japonica
G243	Cheongun	medium-late maturing	japonica
G244	Hyeonpum	medium-late maturing	japonica
G245	Chindeul	medium-late maturing	japonica
G246	Heugsujeong	medium-late maturing	japonica
G247	Misomi	medium-late maturing	japonica
G248	anbaek	medium-late maturing	japonica
G249	Manbaek	medium-late maturing	japonica
G250	Saeshin	medium-late maturing	japonica
G251	Cheonghyang heukmi	medium-late maturing	japonica
G252	Sinjinbaek	medium-late maturing	japonica
G253	Youngjin	medium-late maturing	japonica
G254	Saechilbo	medium-late maturing	japonica
G255	Miho	medium-late maturing	japonica
G256	Aromi	medium-late maturing	japonica
G257	Hangaru	medium-late maturing	japonica
G258	MY298BB	medium-late maturing	japonica
G259	MY299BK	medium-late maturing	japonica
G260	Yechan	medium-late maturing	japonica
G261	Saeilpum	medium-late maturing	japonica
G262	Keunpum	medium-late maturing	japonica
G264	Taebaekbyeo	early maturing	Tongil-type
G265	Cheongcheongbyeo	medium maturing	Tongil-type
G266	Samgangbyeo	medium maturing	Tongil-type
G267	Jungwonbyeo	medium maturing	Tongil-type
G268	Yongmunbyeo	medium maturing	Tongil-type
G270	Dasanbyeo	medium maturing	Tongil-type
G271	Namcheonbyeo	medium maturing	Tongil-type
G273	Andabyeo	medium maturing	Tongil-type
G274	Areum	medium maturing	Tongil-type
G275	Hanareum	medium maturing	Tongil-type
G276	DASAN1HO	medium maturing	Tongil-type
G277	Keunseom	medium maturing	Tongil-type
G278	Hangangchal 1ho	medium maturing	Tongil-type
G279	Dasan2ho	medium maturing	Tongil-type
G280	Hanareum 2	medium maturing	Tongil-type
G281	Palbangmi	medium maturing	Tongil-type
G282	Mimyeon	medium maturing	Tongil-type
G283	Saemimyeon	medium maturing	Tongil-type
G284	Hanareumchal	medium maturing	Tongil-type
G285	Shingil	medium maturing	Tongil-type
G286	Hangangchalbyeo	medium-late maturing	Tongil-type
G287	Nampungbyeo	medium-late maturing	Tongil-type
G288	Jangseongbyeo	medium-late maturing	Tongil-type
G289	Hwangmibyeo 1ho	medium-late maturing	Tongil-type
G290	NOKYANG	medium-late maturing	Tongil-type
G291	Segyejinmi	medium-late maturing	Tongil-type
G292	Hanareum3ho	medium-late maturing	Tongil-type
G293	Hanareum4ho	medium-late maturing	Tongil-type
G294	Geumgang1ho	medium-late maturing	Tongil-type
G295	Mogwoo	medium-late maturing	Tongil-type
G297	Nokwoo	medium-late maturing	Tongil-type
G300	Miwoo	medium-late maturing	Tongil-type

## Sheet: Table S2
Table S2. Information of the planting seasons
Environment	Planting season	Symbol	Sowing date	Transplanting date
Jeonju (JJ)	Early	EJJ	April 9, 2019	May 9, 2019
			April 12, 2021	May 12, 2021
	Regular	RJJ	May 9, 2018	June 9, 2018
			May 4, 2020	June 4, 2020
Suwon (SW)	Early	ESW	April 10, 2019	May 10, 2019
			April 10, 2021	May 10, 2021
	Regular	RSW	April 25, 2018	May 25, 2018
			April 25, 2020	May 25, 2020
Jeonju(JJ)	Early	EJJ	April 10, 2019	May 10, 2019
			April 10, 2021	May 10, 2021
	Regular	RJJ	May 4, 2018	June 4, 2018
			May 6, 2020	June 6, 2020

## Sheet: Table S3
Table S3. Climate data of the test environments
Environment	Year	Months	Temperature (°C)			Precipitation (mm)
			Mean	Max.	Min
RJJ	2018	May	18.9	30.3	7.8	122.1
		June	23.1	34.8	15.2	137.2
		July	27.8	36.8	18.3	169.1
		August	28.6	38.9	19.8	368.9
		September	21.7	31	10.4	101.8
		October	13.9	26.7	4.4	123.2
	2020	May	18.6	29.2	9.2	79
		June	23.4	35.1	13.5	187.5
		July	23.5	31.7	17.7	644.7
		August	27.7	34.6	22.7	471.5
		September	21.3	31.8	13.1	135.2
		October	14.9	26.1	4.7	4.2
EJJ	2019	April	12.6	29	0.1	98.5
		May	18.9	32.4	5.6	45.6
		June	21.9	32.9	12.7	89.1
		July	25.6	34	18.9	176.2
		August	26.8	35.1	19.1	117.7
		September	22.7	31.8	12.6	194.8
	2019	April	14.4	28.6	2.4	34.9
		May	17.7	30.8	6.4	182.2
		June	23	33.6	14.2	145.3
		July	27.2	36.3	20.5	255.1
		August	25.9	34.6	19.4	454.8
		September	22.9	30.2	15.8	162.1
RSW	2018	May	17.9	29.5	6.9	196.4
		June	22.6	33.3	14	107
		July	27.5	37.5	18.5	222.7
		August	28.4	39.3	19	218.6
		September	21.1	30.7	9.2	61.7
		October	12.6	25.6	-0.2	132.7
	2020	May	17.6	29.7	8.6	97.9
		June	23	34	13	91.1
		July	23.8	33	17.5	384.7
		August	26.7	34.9	21.7	659.3
		September	21.1	29.7	12.6	163.4
		October	13.8	24.3	2.2	22.2
ESW	2019	April	11.7	29.2	-1.9	43.6
		May	18.4	32.6	6.7	26.7
		June	22.1	32.7	12.4	68.8
		July	25.8	35.1	18.4	190.9
		August	26.8	36.5	17.4	117.9
		September	22.3	30.4	11.7	201.9
	2019	April	13.5	28.6	3	106.4
		May	16.5	30.4	6.2	179.2
		June	22.5	32.3	12.6	50.1
		July	27.7	36.3	20.2	134.4
		August	25.7	34.4	18.7	161.1
		September	22.6	29.9	15.5	164.1
RMY	2018	May	19	32.6	4.3	93.5
		June	23.1	35.8	13.7	142.6
		July	27.8	38.7	17.9	145.9
		August	27.6	38.9	17.2	372.3
		September	21.1	30.4	9	97.7
		October	13.7	26.6	1.5	155.3
	2020	May	18.9	29.1	6.7	50.3
		June	23.9	35.1	13.6	204.7
		July	23.1	31.8	17.2	403.6
		August	27.8	36.2	22.5	197.2
		September	21	30.7	9.1	236
		October	14.6	26.6	1.7	13.6
EMY	2019	April	12.9	27.5	-1.9	76.4
		May	19.4	33.5	6	48.6
		June	22.2	34.7	12	217.6
		July	25.4	33.9	16.7	201.4
		August	26.9	36.6	16.6	89.9
		September	22.6	32.9	12.6	241.7
	2019	April	14	28.4	1.8	66.7
		May	18.2	30.6	5.2	107.9
		June	23.2	33.3	13.1	68.9
		July	26.7	35.9	19.1	308.2
		August	26.2	37.8	19.4	302.3
		September	22.7	31.4	14.5	60.9

## Sheet: Table S4
Table S4. Analysis of deviane (Type III Wald chi-square test) of linear mixed models for yield related traits.
Maturity group	Source of variation	Df	Chi-squared (χ2)
			CL	PL	PN	SPP	TGW	GY
Early maturing	GEN	80	1156***	657***	520***	1131***	1889***	313***
	ENV	5	537***	152***	974***	167***	171***	405***
	GEI	400	216	123	285	233	283	342
Medium maturing	GEN	89	1455***	1302***	443***	962***	2413***	204***
	ENV	5	162***	78***	529***	67***	80***	166***
	GEI	445	278	144	336	307	232	256
Medium-late maturing	GEN	104	2263***	1817***	364***	966***	5982***	182***
	ENV	5	297***	163***	319***	51***	90***	173***
	GEI	520	298	267	253	388	288	256
For each trait, a linear mixed model was used with genotype (GEN), environment (ENV), and their interaction as fixed effects and test year (REP) as a random effect. Df – degree of freedom; CL – culm length; PL – panicle length; PN – panicle number per plant; SPP – spikelets per panicle; TGW – thousand-grain weight; GY – grain yield. * indicates level of significance of p value at * - p < 0.05; **…

## Sheet: Table S5
Table S5. Genotype ranking based on WAASBY index for all maturity groups
Maturity	Genotype	Group	100/0	95/5	90/10	85/15	80/20	75/25	70/30	65/35	60/40	55/45	50/50	45/55	40/60	35/65	30/70	25/75	20/80	15/85	10/90	5/95	0/100
Early maturing	G1	4	51	49	49	49	50	50	50	52	51	51	51	52	55	56	57	58	59	57	57	58	59
	G2	4	35	36	36	36	35	35	35	34	35	34	36	36	38	39	41	42	47	47	48	50	52
	G3	4	36	38	38	37	37	37	37	37	37	38	40	41	44	47	49	51	52	53	54	57	57
	G4	1	69	69	69	68	67	67	66	66	65	64	63	55	50	43	37	26	18	15	11	10	10
	G5	1	68	68	68	69	69	68	68	67	67	67	67	64	61	58	54	50	45	32	27	23	23
	G6	4	53	52	50	51	49	49	49	48	45	41	44	45	48	46	44	45	46	46	42	39	40
	G7	3	50	51	52	52	54	54	54	56	59	60	64	65	66	68	68	71	72	73	74	73	73
	G8	4	2	3	3	4	6	12	14	16	19	25	30	35	42	51	58	61	66	72	73	74	74
	G11	4	13	15	14	15	20	20	23	25	25	26	29	32	36	41	45	52	55	59	63	66	68
	G13	3	76	75	75	75	76	76	76	78	78	78	77	77	76	74	72	70	68	65	61	55	49
	G14	4	44	43	42	42	41	39	38	35	34	31	31	25	26	26	21	20	19	20	21	22	24
	G15	2	8	8	8	10	9	10	9	11	12	12	13	15	15	20	24	27	32	40	43	47	51
	G16	2	27	25	27	25	23	22	20	18	15	13	11	11	11	11	12	12	13	14	16	18	18
	G17	3	57	58	58	57	57	57	58	57	58	59	60	61	62	63	64	63	65	67	66	68	66
	G18	1	72	72	72	72	72	72	72	72	71	70	69	68	64	62	59	53	48	38	28	24	22
	G19	1	56	56	55	54	53	52	52	51	49	48	45	44	47	42	42	41	37	37	36	34	32
	G20	3	75	76	77	78	79	79	79	80	80	80	80	81	81	81	81	81	81	79	79	77	76
	G21	2	24	24	26	26	25	25	25	24	24	20	20	20	23	24	25	25	27	29	34	35	38
	G22	4	66	67	67	67	68	69	69	70	73	73	72	73	72	72	71	69	71	68	69	64	61
	G23	3	71	71	73	73	73	73	74	75	76	77	78	78	77	78	76	76	74	74	72	70	70
	G24	3	54	55	54	56	56	55	53	55	56	58	56	60	59	60	62	62	63	63	65	67	65
	G25	2	22	23	22	24	24	24	24	22	20	19	19	19	21	21	23	23	26	28	33	36	39
	G26	2	31	28	25	20	18	13	11	8	7	6	6	5	5	5	5	5	5	6	7	7	7
	G27	2	6	6	5	6	7	7	8	10	10	11	12	12	14	16	22	24	29	34	40	44	47
	G28	4	42	42	43	44	45	47	48	49	52	53	55	59	60	64	65	67	69	70	70	71	71
	G29	2	14	9	9	5	4	3	2	3	3	3	3	3	3	3	3	3	3	3	3	4	4
	G30	2	3	2	2	1	1	1	1	1	1	1	1	1	2	2	2	2	2	2	2	2	2
	G31	4	29	29	30	30	29	28	27	28	28	30	28	30	29	31	32	37	40	43	44	45	45
	G32	3	43	45	47	48	51	53	55	61	62	65	68	71	74	76	77	78	78	78	78	79	79
	G33	4	10	10	12	12	13	18	18	20	21	22	25	29	32	35	40	48	51	54	56	62	63
	G34	2	16	13	10	8	5	5	5	4	4	4	4	4	4	4	4	4	4	4	5	5	6
	G35	4	32	35	37	38	39	41	40	42	42	47	50	54	57	59	63	65	67	69	71	72	72
	G36	2	4	5	6	7	8	9	10	12	14	15	17	17	22	28	28	35	44	48	51	54	58
	G37	2	19	18	19	19	21	23	22	23	23	21	22	24	27	29	30	34	41	45	46	49	53
	G38	1	73	73	71	71	70	70	70	69	69	68	66	62	58	54	46	39	25	19	18	15	13
	G39	4	21	21	23	27	26	27	28	29	31	33	34	37	39	44	50	56	57	61	64	65	67
	G40	4	28	30	31	31	31	30	31	32	33	35	37	40	41	48	51	55	56	58	62	63	64
	G41	2	23	22	21	22	22	21	19	19	17	17	14	13	12	13	14	17	17	18	23	26	27
	G43	1	58	57	56	55	52	51	51	50	48	42	43	43	40	40	38	36	33	30	29	29	29
	G44	2	18	17	17	16	17	17	16	15	16	16	15	14	13	14	18	19	23	26	26	30	34
	G45	2	12	11	11	11	11	8	7	7	9	9	9	9	8	8	9	10	10	11	14	17	19
	G46	4	48	48	46	45	44	44	43	41	39	39	38	39	37	36	36	32	34	31	32	32	33
	G47	4	47	47	48	47	47	48	47	46	44	46	46	47	49	52	53	54	53	51	53	53	55
	G48	4	26	26	29	29	28	26	26	26	27	27	27	27	28	30	31	33	38	42	45	46	46
	G49	4	39	39	41	41	42	42	42	44	43	45	48	51	54	57	60	60	61	64	68	69	69
	G50	4	52	54	57	58	58	61	62	65	66	71	74	76	78	79	80	80	80	80	80	80	80
	G51	2	1	1	1	2	2	2	4	6	6	7	8	8	9	10	13	15	21	27	30	38	41
	G52	1	60	60	60	60	60	59	60	59	57	56	54	53	51	50	48	44	42	39	35	31	31
	G53	4	17	19	20	28	30	32	34	38	40	43	52	58	63	66	70	73	76	76	76	76	77
	G54	3	49	50	51	53	55	56	56	60	61	63	65	67	70	71	73	74	75	75	75	75	75
	G55	2	5	4	4	3	3	4	6	5	5	5	5	6	7	7	7	7	9	9	10	11	14
	G56	4	45	44	44	43	43	43	44	43	41	40	42	42	46	45	47	49	49	50	49	48	48
	G57	4	46	46	45	46	46	46	46	47	47	50	49	50	52	55	56	57	58	56	58	60	60
	G58	2	20	20	18	18	16	15	15	14	11	10	10	10	10	9	10	11	12	12	15	16	17
	G59	4	40	41	40	40	40	38	39	36	36	37	35	34	34	33	33	31	35	33	37	37	37
	G60	4	41	40	39	39	38	36	33	31	30	29	23	22	17	15	16	16	15	17	19	20	21
	G61	4	25	31	32	33	36	40	41	45	50	54	58	63	67	69	74	75	77	77	77	78	78
	G62	2	7	7	7	9	10	11	13	13	13	14	16	16	18	27	27	30	36	44	47	51	56
	G63	4	33	34	34	34	34	34	32	33	32	32	33	33	33	32	35	38	39	41	41	41	43
	G64	4	11	14	13	13	15	19	21	21	22	23	24	26	31	34	39	46	50	52	55	61	62
	G65	4	9	12	16	23	27	31	36	40	46	55	62	66	71	75	78	79	79	81	81	81	81
	G66	2	30	27	24	21	19	14	12	9	8	8	7	7	6	6	6	6	6	7	8	8	8
	G67	4	38	37	35	35	33	33	30	30	29	28	26	23	24	22	20	21	22	24	25	27	28
	G69	1	59	59	59	59	59	58	57	53	55	52	47	46	43	38	34	29	24	23	22	21	20
	G71	1	79	79	79	79	78	78	78	76	75	74	73	72	65	61	55	43	30	21	17	12	11
	G72	3	64	64	66	66	66	66	67	68	70	69	70	70	69	67	66	66	64	62	59	56	54
	G74	4	34	33	33	32	32	29	29	27	26	24	21	21	19	17	19	18	20	22	24	25	25
	G75	1	65	65	65	65	65	65	65	64	64	62	61	56	53	49	43	40	28	25	20	19	16
	G76	3	74	74	74	74	74	75	75	74	74	75	75	74	73	70	67	64	60	55	50	40	35
	G77	3	81	81	81	81	81	81	81	81	81	81	81	80	80	80	79	77	73	71	67	59	50
	G78	1	61	61	61	61	61	60	59	54	53	49	41	38	30	25	17	13	11	10	9	9	9
	G79	4	15	16	15	14	14	16	17	17	18	18	18	18	20	23	26	28	31	35	38	42	44
	G80	1	63	63	63	63	63	64	63	62	60	57	53	49	45	37	29	22	16	16	13	13	12
	G81	1	70	70	70	70	71	71	71	73	72	72	71	69	68	65	61	59	54	49	39	33	30
	G82	3	77	77	76	76	77	77	77	77	77	76	76	75	75	73	69	68	62	60	52	43	36
	G83	2	37	32	28	17	12	6	3	2	2	2	2	2	1	1	1	1	1	1	1	1	1
	G84	1	62	62	62	62	62	63	64	63	63	61	59	57	56	53	52	47	43	36	31	28	26
	G85	1	78	78	78	77	75	74	73	71	68	66	57	48	35	19	11	9	7	5	4	3	3
	G86	1	55	53	53	50	48	45	45	39	38	36	32	28	25	18	15	14	14	13	12	14	15
	G87	1	67	66	64	64	64	62	61	58	54	44	39	31	16	12	8	8	8	8	6	6	5
	G264	3	80	80	80	80	80	80	80	79	79	79	79	79	79	77	75	72	70	66	60	52	42
Medium maturing	G88	2	55	56	60	62	63	65	64	67	68	72	77	82	82	83	81	80	81	81	79	79	79
	G89	2	66	65	65	66	66	66	66	64	64	63	61	60	59	58	59	58	55	55	55	54	51
	G90	2	56	57	59	61	61	59	60	62	63	64	66	68	71	72	71	70	70	69	69	71	70
	G91	4	40	39	42	45	48	52	54	56	60	61	63	69	73	74	75	77	77	78	78	78	77
	G92	3	60	60	61	60	58	55	53	52	44	40	39	35	35	31	29	29	30	32	31	28	27
	G93	3	19	20	18	17	15	18	19	19	23	24	28	32	34	38	42	46	50	51	53	56	56
	G95	2	68	68	69	70	71	72	74	74	75	77	78	80	77	76	74	74	73	71	70	70	69
	G96	4	35	36	38	39	41	44	47	48	51	51	52	56	61	65	67	68	68	70	72	72	74
	G97	3	45	45	46	46	44	47	49	47	46	49	47	48	50	54	56	55	57	57	57	57	58
	G98	4	4	9	15	22	28	31	37	41	50	55	60	71	75	80	83	84	86	86	87	87	87
	G99	2	54	53	52	54	55	57	57	57	58	58	57	58	60	63	64	63	63	62	63	63	62
	G100	4	23	28	29	33	35	36	41	43	48	54	56	61	70	73	77	78	79	80	81	81	81
	G102	3	28	29	27	23	17	16	15	15	15	16	16	17	18	20	22	24	25	29	29	29	30
	G103	2	70	70	72	72	72	73	75	75	77	78	79	79	76	75	73	73	71	68	68	67	65
	G104	3	58	59	58	58	57	56	55	54	52	47	45	43	40	41	41	39	38	37	38	38	37
	G105	2	67	67	68	68	67	68	69	71	70	70	71	73	72	71	69	66	65	64	61	60	60
	G106	2	79	80	81	81	82	81	81	81	82	80	75	74	67	60	58	51	47	38	35	33	31
	G107	4	20	22	21	21	22	23	23	25	26	31	35	37	39	46	50	54	59	59	59	61	64
	G109	2	65	66	67	67	68	70	72	73	74	76	80	81	78	77	78	76	75	74	73	73	73
	G110	3	74	71	66	63	56	46	35	23	13	6	5	3	2	2	2	2	2	2	2	2	2
	G111	2	53	54	55	59	62	62	62	66	69	73	81	83	86	85	84	83	83	84	84	83	83
	G112	3	14	13	11	12	10	11	13	14	17	18	19	21	24	27	31	34	37	40	41	43	47
	G113	3	22	23	23	20	18	19	20	20	22	23	27	29	32	34	39	44	45	48	49	51	53
	G114	3	26	24	26	25	23	21	21	21	21	22	23	27	27	30	33	36	39	42	43	45	45
	G115	4	3	4	7	8	13	14	18	22	24	27	34	36	42	49	54	60	62	63	66	69	71
	G116	3	34	34	33	30	25	20	16	13	14	14	13	13	13	15	16	16	17	18	19	21	23
	G117	3	57	55	54	55	53	53	52	50	42	43	41	40	37	39	37	35	36	35	34	36	35
	G118	3	11	12	10	10	11	12	14	16	19	19	21	25	28	33	36	41	43	47	50	53	54
	G119	4	15	19	22	26	26	29	29	37	39	45	48	51	57	66	70	71	74	76	77	77	78
	G120	3	13	8	6	5	3	3	3	4	4	5	6	8	8	9	11	14	14	15	16	18	22
	G121	3	7	2	5	6	6	8	8	12	12	15	15	19	21	24	25	28	34	36	39	39	40
	G122	4	8	11	14	15	19	24	25	29	35	38	43	47	54	57	65	67	69	72	76	76	76
	G123	2	47	50	50	49	51	54	56	55	57	56	58	59	63	64	66	65	66	67	67	68	68
	G124	2	43	47	49	50	54	58	58	61	65	67	73	78	81	82	82	81	82	82	83	84	84
	G125	3	48	48	45	43	42	41	39	36	32	30	29	28	26	26	26	27	29	31	32	31	29
	G126	3	30	30	30	31	31	28	26	27	25	26	31	33	33	35	40	43	42	46	46	48	50
	G127	3	41	40	40	41	43	43	45	42	40	42	44	45	46	47	49	52	52	53	56	55	55
	G128	4	10	17	25	28	33	37	43	51	56	62	69	76	83	86	86	88	89	89	89	89	89
	G129	3	18	16	12	9	9	9	10	11	11	13	14	15	17	19	21	22	23	28	30	30	32
	G130	3	29	25	20	11	8	6	4	3	3	3	3	5	5	5	7	7	10	11	11	12	12
	G131	3	46	46	43	42	40	38	36	31	29	25	24	23	23	23	24	26	26	25	26	26	26
	G132	4	31	31	31	34	34	32	32	35	37	39	40	44	47	51	55	57	60	60	60	62	63
	G133	3	50	49	48	47	46	45	48	44	41	41	42	42	41	42	44	45	46	43	44	42	44
	G134	4	25	27	28	27	27	27	27	28	30	35	36	38	38	44	47	53	53	58	58	59	61
	G135	3	6	1	3	3	4	5	6	6	8	11	12	12	16	18	19	21	22	26	28	32	33
	G137	2	77	78	78	79	81	82	82	83	85	85	86	85	84	79	76	72	67	66	62	58	57
	G138	4	16	18	19	19	20	22	24	26	28	33	37	39	43	48	53	56	61	61	64	64	67
	G139	2	38	41	47	51	59	61	67	72	78	83	88	89	89	90	90	90	90	90	90	90	90
	G140	4	5	10	16	24	32	33	40	46	55	60	64	75	80	84	85	87	88	88	88	88	88
	G141	2	69	69	70	69	69	67	68	68	66	65	65	64	66	62	61	61	58	56	54	52	49
	G142	4	2	5	9	13	16	26	28	32	38	44	49	53	64	70	72	75	78	79	80	82	82
	G143	3	81	81	79	78	78	75	73	65	59	48	38	24	19	16	12	12	11	10	9	9	9
	G144	3	44	42	41	40	39	39	38	34	34	32	32	31	31	28	30	31	33	33	33	34	36
	G145	3	33	32	32	32	29	25	22	18	18	17	17	20	20	22	23	25	24	27	27	27	28
	G146	2	64	64	64	65	65	64	61	60	62	59	54	49	51	52	48	49	48	45	42	40	39
	G147	4	32	33	35	36	38	40	42	45	47	50	50	55	62	68	68	69	72	73	75	75	75
	G148	4	1	7	13	18	24	30	33	40	43	53	59	67	74	78	80	82	85	85	85	85	86
	G149	2	76	76	76	77	77	78	77	76	72	71	70	63	58	55	52	48	44	39	37	35	34
	G150	2	71	73	74	74	75	79	80	80	83	86	87	88	88	88	87	86	84	83	82	80	80
	G151	3	36	35	34	29	21	13	11	10	7	7	7	7	7	8	8	10	12	12	12	14	15
	G152	2	72	72	71	71	70	71	70	70	67	66	67	65	65	61	60	59	54	54	52	50	48
	G153	3	21	21	17	16	14	15	17	17	20	20	22	26	29	32	34	38	41	44	47	49	52
	G154	3	27	26	24	14	12	10	9	9	10	9	10	9	10	11	14	15	15	17	17	17	21
	G155	3	37	37	36	37	36	35	34	33	33	34	33	34	36	36	38	37	40	41	40	41	41
	G156	2	42	44	44	44	45	48	51	53	53	52	51	52	55	59	63	64	64	65	65	66	66
	G157	1	90	90	90	90	90	90	89	88	88	88	82	62	44	25	15	11	8	4	4	4	3
	G158	3	17	15	8	7	7	7	7	7	9	10	11	11	12	14	18	18	20	20	23	24	24
	G160	3	52	51	51	48	49	51	50	49	45	46	46	46	45	45	45	47	49	49	48	47	46
	G161	3	39	38	37	38	37	34	31	30	31	28	30	30	30	29	32	32	35	34	36	37	38
	G162	2	51	52	53	57	60	63	65	69	71	79	83	86	87	87	88	89	87	87	86	86	85
	G163	3	62	62	62	56	52	50	44	38	27	21	18	16	15	12	13	13	13	13	14	13	13
	G265	2	61	63	63	64	64	60	59	59	61	57	53	50	53	53	51	50	51	50	45	44	42
	G266	2	73	74	73	73	74	74	78	79	79	82	85	84	85	81	79	79	76	75	74	74	72
	G267	2	75	75	75	75	76	76	76	77	76	74	72	72	69	67	62	62	56	52	51	46	43
	G268	2	87	88	88	88	88	88	90	90	90	90	90	90	90	89	89	85	80	77	71	65	59
	G270	1	85	85	85	85	85	85	86	86	87	87	84	77	68	56	46	40	32	30	25	22	18
	G271	1	80	79	80	80	80	80	79	78	73	68	62	54	49	43	35	30	27	24	22	23	19
	G273	3	49	43	39	35	30	17	12	8	5	4	4	4	4	4	3	4	4	6	6	8	8
	G274	3	82	82	82	82	79	77	71	63	54	36	20	14	9	7	5	3	3	3	3	3	4
	G275	1	86	86	86	87	87	87	87	87	86	84	76	66	52	40	27	20	16	14	13	11	10
	G276	3	24	14	2	1	1	1	1	1	1	1	1	1	1	1	1	1	1	1	1	1	1
	G277	1	89	89	89	89	89	89	88	89	89	89	89	87	79	69	57	42	31	22	18	16	16
	G278	3	63	61	57	52	47	42	30	24	16	12	8	6	6	6	6	6	5	7	7	7	7
	G279	1	88	87	87	86	86	86	85	84	81	69	55	41	25	17	10	9	7	5	5	5	5
	G280	1	84	84	83	83	83	83	83	82	80	75	68	57	48	37	28	23	18	16	15	15	14
	G281	3	78	77	77	76	73	69	63	58	49	37	26	18	14	10	9	8	9	8	8	6	6
	G282	3	9	6	4	4	5	4	5	5	6	8	9	10	11	13	17	17	21	21	24	25	25
	G283	3	12	3	1	2	2	2	2	2	2	2	2	2	3	3	4	5	6	9	10	10	11
	G284	3	59	58	56	53	50	49	46	39	36	29	25	22	22	21	20	19	19	19	20	20	20
	G285	1	83	83	84	84	84	84	84	85	84	81	74	70	56	50	43	33	28	23	21	19	17
Medium-late maturing	G165	4	10	10	12	15	14	14	17	21	23	24	25	27	29	30	35	43	46	52	54	57	60
	G166	3	99	100	100	100	102	103	104	104	104	104	104	104	103	101	99	96	88	81	76	66	57
	G167	4	44	45	46	47	48	49	50	51	52	53	58	63	67	70	74	76	77	78	78	78	82
	G168	4	12	16	19	24	26	32	35	38	39	42	49	56	65	72	76	80	82	86	87	88	93
	G169	2	86	86	84	84	82	82	81	80	81	80	79	72	70	65	61	55	48	42	43	43	42
	G170	2	75	76	76	76	75	77	77	75	77	79	81	77	74	73	72	68	65	60	56	54	53
	G171	2	70	69	68	66	64	62	61	57	49	48	39	35	33	29	30	31	32	31	31	31	32
	G172	3	95	95	96	95	95	94	93	93	93	92	92	92	87	87	82	78	74	67	61	53	49
	G174	2	104	104	103	101	100	100	100	100	99	95	89	83	68	47	29	22	14	11	7	6	4
	G175	2	65	66	64	64	65	66	65	64	62	63	62	64	64	63	64	63	63	59	59	58	58
	G176	2	83	80	78	78	77	76	73	73	68	62	55	47	42	34	31	29	28	26	22	20	19
	G177	2	41	42	45	46	45	47	45	44	43	44	44	46	49	54	59	60	60	64	63	65	64
	G178	2	61	60	59	60	60	58	57	58	54	51	52	51	51	52	56	51	52	53	51	50	50
	G179	1	22	23	21	17	17	17	16	18	19	20	20	21	21	25	27	28	33	36	39	40	43
	G180	2	66	64	62	62	62	63	62	59	59	52	53	50	48	49	45	47	44	43	47	47	46
	G181	3	78	78	80	81	84	86	89	89	88	90	91	94	95	95	94	94	94	93	90	89	88
	G182	2	87	87	85	82	81	81	79	78	76	77	71	66	59	55	49	42	40	39	38	36	34
	G183	4	50	52	52	53	54	53	53	53	53	54	57	61	62	67	67	70	72	72	71	72	70
	G184	2	71	71	71	72	69	68	67	66	61	61	59	57	55	53	53	49	45	44	46	46	45
	G185	1	16	11	10	9	7	8	8	7	7	8	9	9	10	11	11	12	13	15	17	18	20
	G186	2	105	105	105	105	104	104	102	102	102	101	96	88	82	66	42	30	21	14	12	8	8
	G187	2	51	50	51	50	50	48	49	47	45	43	43	45	45	45	46	48	49	50	52	51	52
	G188	4	1	3	4	5	8	9	9	11	18	22	23	24	27	32	36	46	50	55	60	62	65
	G189	3	96	97	97	97	97	97	99	99	101	102	103	103	104	103	103	101	102	101	99	96	94
	G190	1	48	44	42	40	38	33	32	27	26	23	22	19	18	19	19	20	22	23	21	23	23
	G191	1	35	35	35	32	30	29	27	24	22	21	19	20	20	20	22	23	26	28	28	29	33
	G192	1	37	36	34	31	29	28	22	22	20	18	18	17	17	16	18	19	19	22	23	24	25
	G193	4	38	39	40	42	43	44	44	45	46	49	48	52	56	61	65	67	71	73	74	73	73
	G194	1	11	9	7	6	5	5	5	5	5	5	5	7	7	7	8	10	11	12	14	14	17
	G195	4	32	32	38	44	47	51	55	62	66	75	83	85	88	94	97	99	101	103	103	103	103
	G196	3	64	67	69	70	71	71	74	76	82	84	85	90	94	96	98	98	99	99	100	100	100
	G197	2	57	57	57	58	57	54	51	48	48	46	42	40	41	37	38	38	41	41	42	44	44
	G198	2	77	77	77	77	78	78	78	77	79	81	82	80	75	74	73	71	67	62	58	56	54
	G200	3	91	91	91	93	93	95	95	97	97	100	101	101	100	100	100	100	98	98	96	94	92
	G201	4	47	46	48	48	51	52	52	54	58	58	61	67	72	75	77	79	80	80	83	85	86
	G202	1	15	12	13	14	13	13	11	15	17	19	21	22	23	27	28	32	36	40	41	45	48
	G203	1	4	2	2	3	4	4	4	4	6	6	7	8	9	10	13	14	15	18	19	21	22
	G204	4	13	14	16	16	19	19	25	30	32	32	35	37	44	51	58	61	66	71	73	74	75
	G205	1	40	37	36	30	27	18	19	14	11	12	12	12	12	12	12	11	12	13	15	15	16
	G206	1	7	8	6	7	6	6	7	8	8	9	10	11	13	13	14	15	18	21	25	27	30
	G207	1	17	15	14	12	12	11	10	10	12	14	17	18	19	21	23	27	30	32	36	39	41
	G208	3	74	74	74	75	79	80	82	85	85	85	87	91	93	93	93	93	93	92	92	91	90
	G209	4	23	24	25	25	24	24	24	26	27	28	26	28	30	31	34	39	42	47	50	52	55
	G210	1	9	7	3	2	2	2	2	2	2	2	2	2	2	2	2	2	2	4	4	4	5
	G211	4	28	30	32	36	41	46	48	50	55	59	65	73	78	82	87	90	92	94	97	98	97
	G212	1	29	27	26	21	18	16	14	12	13	13	14	15	15	15	17	18	20	24	26	26	29
	G213	1	34	34	30	28	25	20	20	17	16	16	15	14	14	14	15	16	17	20	20	22	21
	G214	4	3	5	9	13	15	23	30	35	38	40	51	60	69	78	80	84	87	90	95	97	98
	G215	3	94	94	93	94	94	93	94	94	94	94	93	93	92	89	86	82	79	75	68	61	56
	G216	1	26	26	24	18	16	15	13	13	15	15	16	16	16	17	20	21	24	27	29	32	35
	G217	2	76	75	75	74	74	73	71	71	69	64	60	55	50	44	41	37	37	37	37	38	36
	G218	3	80	79	81	83	83	85	85	87	86	87	86	87	89	90	90	86	84	83	81	80	79
	G219	1	49	49	43	39	33	30	21	16	10	11	11	10	8	8	7	8	8	9	11	12	12
	G220	3	81	82	83	85	85	87	88	88	87	89	88	89	91	91	91	88	85	85	84	82	81
	G221	4	14	17	17	19	22	26	29	33	33	36	38	43	47	56	62	65	73	74	77	77	80
	G222	2	97	96	95	91	91	90	86	83	75	67	54	41	28	23	16	13	10	8	6	7	7
	G223	4	39	40	41	43	42	42	43	43	44	47	45	49	54	59	63	64	68	70	70	71	71
	G224	4	33	33	33	34	35	35	37	36	36	37	37	36	40	42	48	50	53	56	55	60	62
	G226	2	89	89	89	89	87	84	83	79	78	76	68	62	52	40	33	33	31	29	24	19	18
	G227	4	63	63	63	65	66	67	68	68	70	71	73	71	73	76	75	77	76	76	75	76	74
	G228	4	20	21	23	22	21	21	23	25	28	29	28	29	31	35	37	45	47	51	53	55	59
	G229	3	59	62	66	67	70	72	75	81	84	86	90	96	99	99	101	104	104	104	104	104	104
	G230	4	21	25	27	27	28	31	31	34	34	34	36	38	43	48	57	59	62	65	67	69	69
	G233	4	2	4	5	8	10	10	12	19	24	27	29	31	37	41	54	58	64	68	72	75	76
	G234	2	43	43	44	45	44	45	42	42	41	39	40	44	46	50	55	54	55	57	57	59	61
	G235	2	72	72	72	68	67	64	60	52	47	38	33	26	24	22	21	17	16	16	16	16	14
	G236	3	92	93	94	96	96	96	96	96	96	98	99	98	98	98	95	92	90	87	85	81	77
	G237	2	98	98	98	98	98	98	98	98	98	97	97	95	90	86	78	72	61	54	45	41	39
	G238	3	82	85	87	87	88	89	90	90	92	91	94	97	97	97	96	97	96	95	93	92	89
	G239	1	60	56	55	52	46	40	36	29	21	17	13	13	11	9	9	9	9	10	10	10	11
	G240	4	25	29	29	35	40	43	46	49	57	60	67	75	81	84	89	91	95	96	98	99	99
	G241	4	54	54	53	54	56	56	54	56	56	55	56	58	60	62	66	66	69	69	69	68	67
	G242	4	8	13	20	26	31	37	41	46	51	57	66	76	86	88	92	95	97	100	101	102	102
	G243	4	18	18	18	20	20	22	26	28	30	30	32	34	39	43	52	57	58	61	65	67	68
	G244	4	19	20	22	23	23	25	28	31	31	31	31	32	38	39	47	52	56	58	62	64	66
	G245	4	45	47	49	49	52	55	56	60	60	65	74	79	79	81	85	87	89	89	91	93	95
	G246	3	79	81	86	86	89	91	91	92	95	96	100	100	101	102	102	102	103	102	102	101	101
	G247	2	68	70	70	69	68	69	69	69	71	70	69	69	71	71	69	69	70	66	64	63	63
	G248	4	46	48	50	51	53	57	58	61	63	69	75	81	85	85	88	89	91	91	94	95	96
	G249	4	58	59	61	61	63	65	66	67	72	74	76	78	77	80	79	81	81	82	82	84	84
	G250	1	42	41	39	38	37	34	33	32	29	25	24	23	22	24	24	26	29	30	30	33	37
	G251	4	52	53	54	57	58	60	64	65	67	73	78	82	84	83	84	85	86	88	88	90	91
	G252	4	53	55	56	59	59	59	63	63	64	66	72	74	76	79	81	83	83	84	86	87	87
	G253	4	6	6	8	10	11	12	15	20	25	26	27	30	34	38	44	53	57	63	66	70	72
	G254	4	36	38	37	37	39	38	38	37	35	35	34	33	35	36	40	44	43	46	49	49	51
	G255	4	31	31	31	33	36	39	40	40	42	45	47	53	57	64	68	73	75	77	79	79	83
	G256	3	56	61	67	71	72	75	80	86	89	93	98	102	102	104	105	105	105	105	105	105	105
	G257	2	103	103	102	102	101	101	101	101	100	99	95	86	80	69	43	34	25	17	13	13	9
	G258	2	93	92	92	92	92	92	92	91	90	88	84	84	83	77	70	62	54	48	44	42	40
	G259	2	62	58	58	56	55	50	47	41	37	33	30	25	25	26	25	25	27	25	27	25	24
	G260	2	88	88	88	88	86	83	84	82	80	78	77	68	63	57	50	41	39	38	35	34	31
	G261	2	85	84	82	80	80	79	76	74	74	72	63	59	53	46	39	36	35	33	32	28	28
	G262	4	24	28	28	29	32	36	39	39	40	41	46	54	58	68	71	75	78	79	80	83	85
	G286	1	27	22	15	11	9	7	6	6	4	4	4	4	4	6	6	6	6	6	8	9	10
	G287	2	90	90	90	90	90	88	87	84	83	82	80	70	66	58	51	40	38	35	33	30	27
	G288	2	84	83	79	79	76	74	72	70	65	56	50	42	32	28	26	24	23	19	18	17	15
	G289	2	67	68	65	63	61	61	59	55	50	50	41	39	36	33	32	35	34	34	34	37	38
	G290	2	73	73	73	73	73	70	70	72	73	68	64	65	61	60	60	56	51	49	48	48	47
	G291	1	5	1	1	1	1	3	3	3	3	3	3	3	3	4	5	5	7	7	9	11	13
	G292	1	30	19	11	4	3	1	1	1	1	1	1	1	1	1	1	1	1	1	1	1	1
	G293	2	102	102	101	103	103	102	103	103	103	103	102	99	96	92	83	74	59	45	40	35	26
	G294	1	55	51	47	41	34	27	18	9	9	7	6	5	5	5	4	4	4	5	5	5	6
	G295	1	69	65	60	55	49	41	34	23	14	10	8	6	6	3	3	3	3	3	3	3	3
	G297	3	101	101	104	104	105	105	105	105	105	105	105	105	105	105	104	103	100	97	89	86	78
	G300	2	100	99	99	99	99	99	97	95	91	83	70	48	26	18	10	7	5	2	2	2	2

## Sheet: Table S6
Table S6. Statistics summary of yield-related traits and grain yield
Trait	Earliness	Mean	Min	Max	σ	CV
PL	Early maturing	21.2973	18.7667	27.6917	1.42231	6.67837
	Medium maturing	22.1265	18.6833	28.1	1.71867	7.7675
	Medium-late maturing	21.3288	19.1083	23.9167	0.984058	4.61375
CL	Early maturing	75.2958	65.7833	97.4917	5.34063	7.09287
	Medium maturing	76.5826	61.4833	89.85	5.71494	7.46245
	Medium-late maturing	76.7364	63.2833	87.85	5.43594	7.08391
PN	Early maturing	13.0004	8.18333	15.9833	1.47749	11.365
	Medium maturing	13.0643	9.575	16.025	1.37421	10.5188
	Medium-late maturing	13.3196	10.8	15.475	1.00326	7.53218
SPP	Early maturing	109.371	77.3231	214.551	18.9586	17.3343
	Medium maturing	118.456	81.2849	189.412	21.1467	17.8519
	Medium-late maturing	110.446	84.3121	142.397	11.8521	10.7311
TGW	Early maturing	20.6366	15.0125	24.6775	1.36998	6.63857
	Medium maturing	21.3434	16.735	26.5933	1.62863	7.6306
	Medium-late maturing	21.9248	15.5025	33.4533	2.21422	10.0992
GY	Early maturing	28.5682	20.8739	39.5826	3.17458	11.1123
	Medium maturing	32.5283	24.0938	42.7863	4.00891	12.3244
	Medium-late maturing	32.1409	24.1015	39.8893	3.28263	10.2132
